# Supplementary material
Source: PubMed Central journal article supplement (PMC8882337)
Supplement: NIHMS1775196-supplement-1.pdf [file NIHMS1775196-supplement-1.pdf]

## Supplementary Materials

**Supplementary Table 1: Seizure Frequencies**

|                     | T-RTT (N= 504) |       | A-RTT (N=38) |        | N-RTT (N=42) |        |
|---------------------|----------------|-------|--------------|--------|--------------|--------|
|                     | Freq. (n)      | %     | Freq. (n)    | %      | Freq. (n)    | %      |
| Absent              | 224            | 44.4% | 25           | 65.8 % | 26           | 61.9 % |
| < Monthly           | 94             | 18.7% | 5            | 13.2 % | 7            | 16.7 % |
| < Weekly to monthly | 57             | 11.3% | 2            | 5.3 %  | 1            | 2.4 %  |
| Weekly              | 50             | 9.9%  | 2            | 5.3%   | 1            | 2.4 %  |
| > Weekly            | 26             | 5.2%  | 3            | 7.9 %  | 0            | 0 %    |
| Daily               | 53             | 10.5% | 1            | 2.6 %  | 7            | 16.7 % |

  

|                     | CDD (N=49) |       | FOXG1 (N=37) |       | MDD (N=42) |       |
|---------------------|------------|-------|--------------|-------|------------|-------|
|                     | Freq. (n)  | %     | Freq. (n)    | %     | Freq. (n)  | %     |
| Absent              | 6          | 12.2% | 16           | 43.2% | 25         | 59.5% |
| < Monthly           | 2          | 4.1%  | 10           | 27.0% | 3          | 7.1%  |
| < Weekly to monthly | 1          | 2.0%  | 5            | 13.5% | 2          | 4.8%  |
| Weekly              | 5          | 10.2% | 4            | 10.8% | 1          | 2.4%  |
| > Weekly            | 3          | 6.1%  | 1            | 2.7%  | 2          | 4.8%  |
| Daily               | 32         | 65.3% | 1            | 2.7%  | 9          | 21.4% |

**Supplementary Table 2: Investigator Impressions of Reported Seizures**

|                 | T-RTT (N= 535) |                               | A-RTT (N= 39) |                               | N-RTT (N=44) |                               |
|-----------------|----------------|-------------------------------|---------------|-------------------------------|--------------|-------------------------------|
|                 | Freq. (n)      | Percent of total participants | Freq. (n)     | Percent of total participants | Freq. (n)    | Percent of total participants |
| Absence         | 14             | 2.6%                          | 2             | 5.1 %                         | 1            | 2.3 %                         |
| Atonic          | 25             | 4.7%                          | 2             | 5.1 %                         | 2            | 4.6 %                         |
| Complex Partial | 73             | 13.6%                         | 5             | 12.8 %                        | 5            | 11.4 %                        |
| Generalized     | 144            | 26.9%                         | 7             | 17.9 %                        | 8            | 18.2 %                        |
| Infantile Spasm | 2              | 0.4%                          | 0             | 0 %                           | 1            | 2.3 %                         |
| Myoclonic       | 12             | 2.2%                          | 0             | 0%                            | 0            | 0 %                           |
| Not A Seizure   | 68             | 12.7%                         | 4             | 10.3 %                        | 11           | 26.5 %                        |
| Partial         | 45             | 8.4%                          | 1             | 2.3 %                         | 0            | 0 %                           |
| Rett Spell      | 86             | 16.1%                         | 4             | 10.3 %                        | 0            | 0 %                           |
| Tonic-Clonic    | 81             | 15.1%                         | 3             | 7.7 %                         | 4            | 9.09 %                        |

|                 | CDD (N=53) |                               | FOXG1 (N=43) |                               | MDD (N=49) |                               |
|-----------------|------------|-------------------------------|--------------|-------------------------------|------------|-------------------------------|
|                 | Freq. (n)  | Percent of total participants | Freq. (n)    | Percent of total participants | Freq. (n)  | Percent of total participants |
| Absence         | 2          | 3.8%                          | 2            | 4.7%                          | 5          | 10.2%                         |
| Atonic          | 8          | 15.1%                         | 1            | 2.3%                          | 7          | 14.3%                         |
| Complex Partial | 6          | 11.3%                         | 11           | 25.6%                         | 6          | 12.2%                         |
| Generalized     | 22         | 41.5%                         | 10           | 23.3%                         | 11         | 22.5%                         |
| Infantile Spasm | 24         | 45.3%                         | 2            | 4.7%                          | 0          | 0.0%                          |
| Myoclonic       | 16         | 30.2%                         | 1            | 2.3%                          | 4          | 8.2%                          |
| Not A Seizure   | 4          | 7.6%                          | 7            | 16.3%                         | 13         | 26.5%                         |
| Partial         | 5          | 9.4%                          | 4            | 9.3%                          | 1          | 2.0%                          |
| Rett Spell      | 2          | 3.8%                          | 0            | 0.0%                          | 0          | 0.0%                          |
| Tonic-Clonic    | 21         | 39.6%                         | 8            | 18.6%                         | 11         | 22.5%                         |

**Supplementary Table 3: Association between Clinical Variables and Outcomes**

| <b>Association between HC Z-Score and Age of Seizure Onset (months)</b>                                         |                   |               |                |                         |                 |             |         |
|-----------------------------------------------------------------------------------------------------------------|-------------------|---------------|----------------|-------------------------|-----------------|-------------|---------|
|                                                                                                                 | Linear Regression |               |                |                         | Spearman's Rank |             |         |
|                                                                                                                 | N                 | Model p-value | R <sup>2</sup> | Coefficient Independent | 95% CI          | Correlation | P value |
| T-RTT                                                                                                           | 247               | 0.288         | 0.0046         | -3.986                  | -11.11, 3.314   | -0.0385     | 0.547   |
| A-RTT                                                                                                           | 15                | 0.949         | 0.0003         | -0.605                  | -20.49, 19.28   | 0.0286      | 0.919   |
| N-RTT                                                                                                           | 13                | 0.983         | 0.0000         | 0.130                   | -12.87, 13.134  | 0.0000      | 1.0000  |
| CDD                                                                                                             | 49                | 0.333         | 0.0199         | 0.704                   | -0.744, 2.153   | -0.0749     | 0.609   |
| FOXG1                                                                                                           | 29                | 0.717         | 0.0049         | -1.243                  | -8.21, 5.72     | -0.244      | 0.203   |
| MDD                                                                                                             | 22                | 0.0097        | 0.290          | 21.307                  | 5.756, 36.858   | 0.700       | 0.0003  |
| <b>Association between Clinical Severity Scale (minus epilepsy sub-score) and Age of Seizure Onset (months)</b> |                   |               |                |                         |                 |             |         |
|                                                                                                                 | Linear Regression |               |                |                         | Spearman's Rank |             |         |
|                                                                                                                 | N                 | Model p-value | R <sup>2</sup> | Coefficient Independent | 95% CI          | Correlation | P value |
| T-RTT                                                                                                           | 242               | 0.967         | <0.0001        | 0.0287                  | -1.32, 1.38     | -0.0111     | 0.863   |
| A-RTT                                                                                                           | 16                | 0.987         | <0.0001        | -0.019                  | -2.37, 2.34     | -0.247      | 0.356   |
| N-RTT                                                                                                           | 13                | 0.0501        | 0.3054         | -1.805                  | -3.61, 0.001    | -0.6997     | 0.008   |
| CDD                                                                                                             | 45                | 0.0024        | 0.195          | -0.449                  | -0.729, -0.168  | -0.165      | 0.280   |
| FOXG1                                                                                                           | 24                | 0.469         | 0.0241         | -0.641                  | -2.45, 1.16     | -0.246      | 0.247   |
| MDD                                                                                                             | 20                | 0.242         | 0.0503         | -2.118                  | -6.68, 2.43     | -0.294      | 0.209   |
| <b>Association between Age of Seizure Onset and Age of Regression</b>                                           |                   |               |                |                         |                 |             |         |
|                                                                                                                 | Linear Regression |               |                |                         | Spearman's Rank |             |         |
|                                                                                                                 | N                 | Model p-value | R <sup>2</sup> | Coefficient Independent | 95% CI          | Correlation | P value |

|       |     |       |         |          |                    |         |       |
|-------|-----|-------|---------|----------|--------------------|---------|-------|
| T-RTT | 246 | 0.941 | <0.0001 | 0.000507 | -0.0129,<br>0.0139 | 0.029   | 0.651 |
| A-RTT | 14  | 0.005 | 0.4969  | 0.222    | 0.081,<br>0.362    | 0.386   | 0.173 |
| N-RTT | 5   | 0.432 | 0.2145  | -4.357   | -19.677,<br>10.063 | -0.100  | 0.873 |
| CDD   | 17  | 0.662 | 0.0131  | -1.032   | -5.96,<br>3.89     | -0.0103 | 0.959 |
| FOXG1 | 13  | 0.655 | 0.0188  | 0.0883   | -0.335,<br>0.512   | 0.142   | 0.643 |
| MDD   | 9   | 0.990 | <0.0001 | -0.00244 | -0.440,<br>0.434   | 0.252   | 0.513 |

**Supplementary Table 4: Clinical Severity Scale Breakdown**

| Manifestation                | Definition                                                                                                                                                                                                                    |
|------------------------------|-------------------------------------------------------------------------------------------------------------------------------------------------------------------------------------------------------------------------------|
| <b>Historical Items</b>      |                                                                                                                                                                                                                               |
| Age of onset of regression   | 0: No Regression<br>1: > 30 months<br>2: 18 months to 30 months<br>3: 12 months to < 18 months<br>4: 6 months to < 12 months<br>5: < 6 months                                                                                 |
| Onset of stereotypies        | 0: ≥ 10 years or no stereotypies<br>1: 36 months to < 10 years<br>2: 18 to < 36 months<br>3: 12 to < 18 months<br>4: < 12 months                                                                                              |
| Head growth                  | 0: None to minimal deceleration (0-1 centile)<br>1: Deceleration > 2 centiles, OFC > 10th after 24 months<br>2: 2nd - 10th centile after 24 months<br>3: 2nd - 10th centile before 24 months<br>4: < 2nd centile by 24 months |
| <b>Growth</b>                |                                                                                                                                                                                                                               |
| Somatic growth at this visit | 0: No growth failure (26th - 50th % or above)<br>1: Decrease in BMI (11th - 25th %)<br>2: Decrease in BMI (5th - 10th %)<br>3: Decrease in BMI (< 5th %)<br>4: Decrease in BMI (< < 5th %)                                    |
| <b>Motor</b>                 |                                                                                                                                                                                                                               |

|                                               |                                                                                                                                                                                                                                                                                                                                                                                                          |
|-----------------------------------------------|----------------------------------------------------------------------------------------------------------------------------------------------------------------------------------------------------------------------------------------------------------------------------------------------------------------------------------------------------------------------------------------------------------|
| Independent sitting at this visit by exam     | <ul style="list-style-type: none"> <li>0: Sits alone acquired &lt; 8 months</li> <li>1: Sit with delayed acquisition &gt; 8 months</li> <li>2: Sit with delayed acquisition &gt; 18 months</li> <li>3: Sit with delayed acquisition &gt; 30 months</li> <li>4: Lost</li> <li>5: Never acquired</li> </ul>                                                                                                |
| Ambulation at this visit by exam              | <ul style="list-style-type: none"> <li>0: Acquired &lt; 18 months / Apraxic gait</li> <li>1: 18 months ≤ walks alone ≤ 30 months</li> <li>2: &gt; 30 months walks alone</li> <li>3: &gt; 50 months walks with help</li> <li>4: Lost</li> <li>5: Never acquired</li> </ul>                                                                                                                                |
| Hand use                                      | <ul style="list-style-type: none"> <li>0: Acquired &amp; conserved</li> <li>1: Holding of objects acquired on time (by 6-8 months) and partially conserved</li> <li>2: Holding of objects acquired late (&gt; 10 months) and partially conserved</li> <li>3: Holding of objects acquired and lost all acquisitions (except, for example, scratching, rubbing nose)</li> <li>4: Never acquired</li> </ul> |
| Scoliosis                                     | <ul style="list-style-type: none"> <li>0: None</li> <li>1: 1° to &lt; 20°</li> <li>2: 20° to &lt; 40°</li> <li>3: 40° to &lt; 60°</li> <li>4: ≥ 60°</li> <li>5: Surgery</li> </ul>                                                                                                                                                                                                                       |
| <b>Communication</b>                          |                                                                                                                                                                                                                                                                                                                                                                                                          |
| Language at this visit by exam                | <ul style="list-style-type: none"> <li>0: Preserved, contextual</li> <li>1: Short phrases only</li> <li>2: Single words</li> <li>3: Vocalization, babbling</li> <li>4: Screaming, no utterances</li> </ul>                                                                                                                                                                                               |
| Nonverbal communication at this visit by exam | <ul style="list-style-type: none"> <li>0: Preserved and propositive (points consistently with finger or eyes)</li> <li>1: Good eye contact maintained (≥30 seconds)</li> <li>2: Intermittent eye contact (5 seconds to &lt; 30 seconds)</li> <li>3: Infrequent eye contact (&lt; 5 seconds)</li> <li>4: Lost and not regained</li> <li>5: None</li> </ul>                                                |
| <b>Rett Behaviors</b>                         |                                                                                                                                                                                                                                                                                                                                                                                                          |

|                                               |                                                                                                                                                                                                                                                                                                      |
|-----------------------------------------------|------------------------------------------------------------------------------------------------------------------------------------------------------------------------------------------------------------------------------------------------------------------------------------------------------|
| Respiratory dysfunction at this visit by exam | <p>0: None</p> <p>1: Minimal hyperventilation and/or apnea (&lt; 10% of time)</p> <p>2: Intermittent hyperventilation and/or apnea (50% of time)</p> <p>3: Constant hyperventilation and/or apnea without cyanosis (100% of time)</p> <p>4: Constant hyperventilation and/or apnea with cyanosis</p> |
| Autonomic symptoms at this visit by exam      | <p>0: None</p> <p>1: Pink but cool</p> <p>2: Mottled and cold</p> <p>3: Blue-purple and cold hands or feet</p> <p>4: Blue-purple and cold hands and feet</p>                                                                                                                                         |
| Epilepsy/Seizures at this visit               | <p>0: Absent</p> <p>1: &lt; Monthly</p> <p>2: &lt; Weekly to monthly</p> <p>3: Weekly</p> <p>4: More than weekly</p> <p>5: Daily (intractable)</p>                                                                                                                                                   |
